# Supplementary material
Source: PubMed Central journal article supplement (PMC7571905)
Supplement: mmc1.pdf [file mmc1.pdf]

# THE LANCET

## Digital Health

### **Supplementary appendix**

This appendix formed part of the original submission and has been peer reviewed.  
We post it as supplied by the authors.

Supplement to: Titov N, Dear BF, Nielsen O, et al. User characteristics and outcomes from a national digital mental health service: an observational study of registrants of the Australian MindSpot Clinic. *Lancet Digit Health* 2020; **2**: e582–93.

## **Appendix**

### **Therapists**

Most MindSpot therapists are nationally registered psychologists with a post-graduate or master's degree in clinical psychology, with the remainder being provisional psychologists in training, social workers, general and mental health nurses, and counsellors with other qualifications and experience. MindSpot therapists receive training in the principles of online psychological assessment and treatment, including detailed instruction in course delivery. Psychiatrists and cultural consultants are available for supervision and training. All therapists receive regular supervision and attend external and internal training workshops.

## Appendix

Figure S1. Number of completed assessments by year

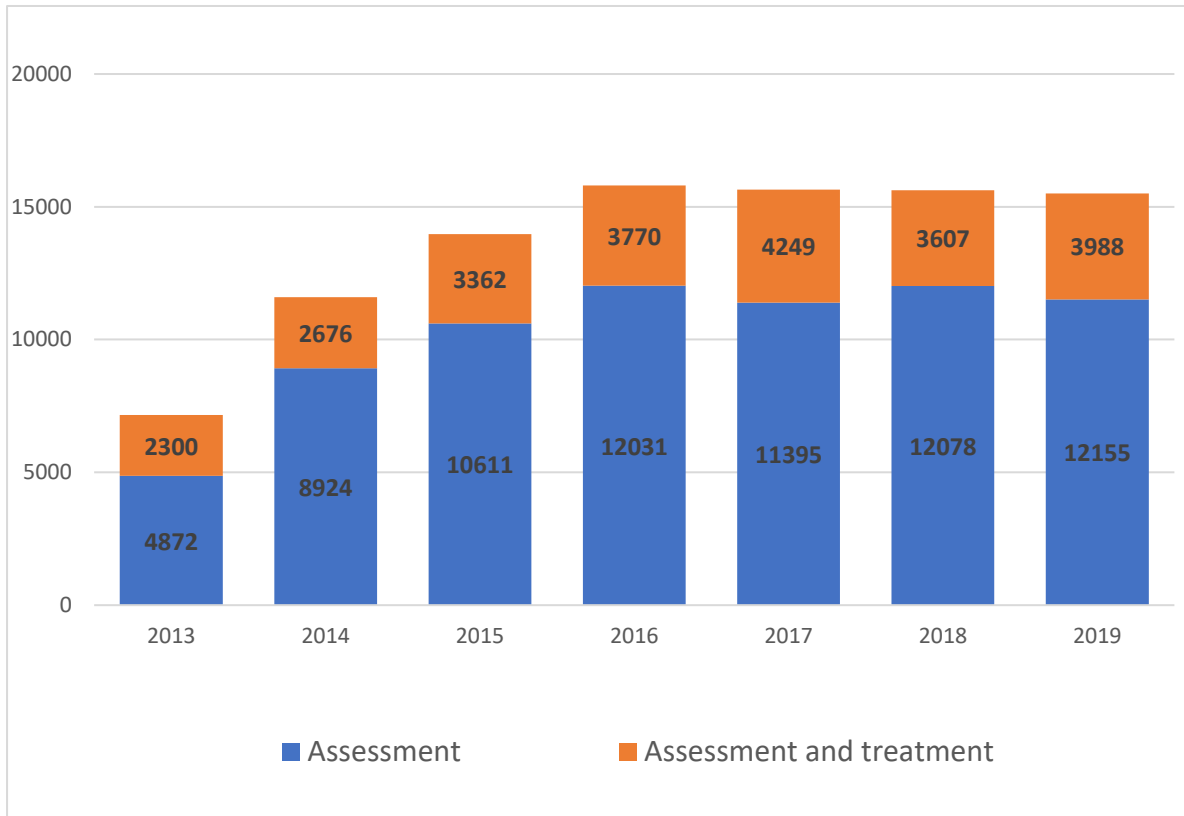

## Appendix

Figure S2. Trends in number of assessments started by age group

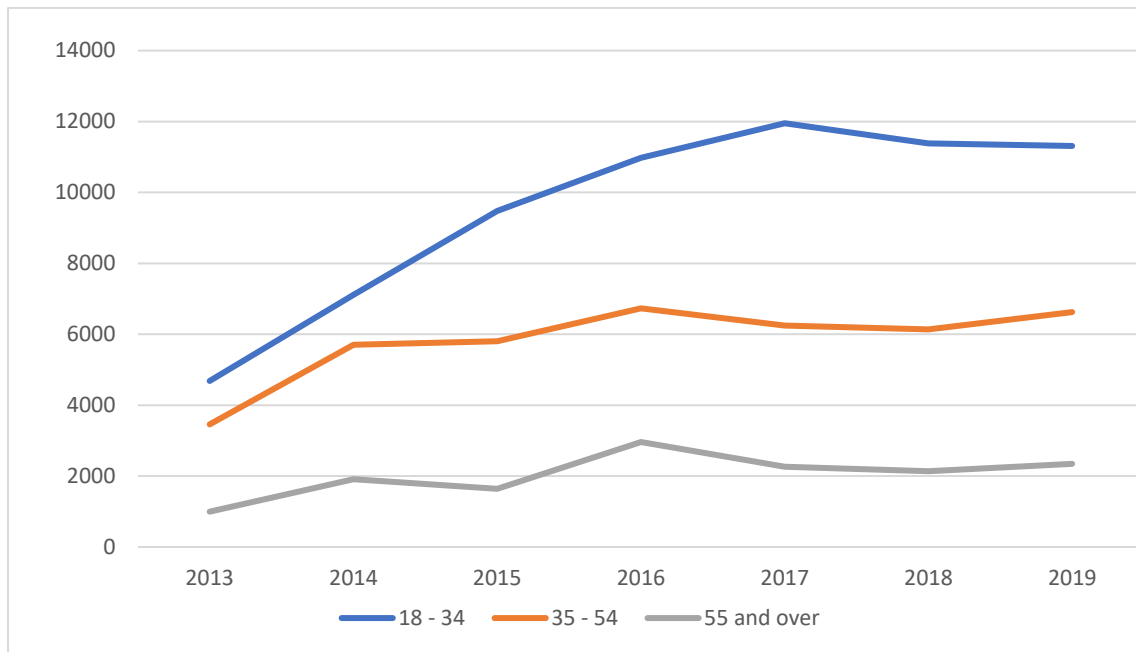

## Appendix

**Table S1. Breakdown of number of assessments started: by year and state**

|                              | 2013 |       | 2014 |       | 2015 |       | 2016 |       | 2017 |       | 2018 |       | 2019 |       | TOTAL        |              | National proportions* |
|------------------------------|------|-------|------|-------|------|-------|------|-------|------|-------|------|-------|------|-------|--------------|--------------|-----------------------|
|                              | n    | %     | n    | %     | n    | %     | n    | %     | n    | %     | n    | %     | n    | %     | n            | %            |                       |
| Australian Capital Territory | 223  | 2.5%  | 355  | 2.4%  | 440  | 2.6%  | 439  | 2.1%  | 486  | 2.4%  | 515  | 2.6%  | 547  | 2.7%  | <b>3005</b>  | <b>2.5%</b>  | <b>1.7%</b>           |
| New South Wales              | 2794 | 31.3% | 4614 | 31.3% | 5351 | 31.6% | 6654 | 32.2% | 6680 | 32.6% | 6447 | 32.8% | 6639 | 32.7% | <b>39181</b> | <b>32.2%</b> | <b>31.8%</b>          |
| Northern Territory           | 106  | 1.2%  | 163  | 1.1%  | 206  | 1.2%  | 219  | 1.1%  | 261  | 1.3%  | 222  | 1.1%  | 210  | 1.0%  | <b>1387</b>  | <b>1.1%</b>  | <b>1.0%</b>           |
| Queensland                   | 1819 | 20.4% | 2957 | 20.1% | 3147 | 18.6% | 4168 | 20.2% | 3867 | 18.9% | 3843 | 19.5% | 4103 | 20.2% | <b>23904</b> | <b>19.6%</b> | <b>20.1%</b>          |
| South Australia              | 600  | 6.7%  | 1080 | 7.3%  | 1241 | 7.3%  | 1414 | 6.8%  | 1365 | 6.7%  | 1398 | 7.1%  | 1388 | 6.8%  | <b>8486</b>  | <b>7.0%</b>  | <b>6.9%</b>           |
| Tasmania                     | 202  | 2.3%  | 365  | 2.5%  | 386  | 2.3%  | 572  | 2.8%  | 571  | 2.8%  | 563  | 2.9%  | 569  | 2.8%  | <b>3228</b>  | <b>2.7%</b>  | <b>2.1%</b>           |
| Victoria                     | 2214 | 24.8% | 3481 | 23.6% | 4226 | 25.0% | 4947 | 23.9% | 4855 | 23.7% | 4618 | 23.5% | 4791 | 23.6% | <b>29132</b> | <b>23.9%</b> | <b>26.1%</b>          |
| Western Australia            | 971  | 10.9% | 1712 | 11.6% | 1920 | 11.3% | 2259 | 10.9% | 2376 | 11.6% | 2054 | 10.4% | 2037 | 10.0% | <b>13329</b> | <b>11.0%</b> | <b>10.4%</b>          |

\* National proportions from Australian Bureau of Statistics, released 24/09/2020

<https://www.abs.gov.au/statistics/people/population/national-state-and-territory-population/latest-release#states-and-territories>.

## Appendix

**Table S2. Treatment outcomes by year**

|                        | 2013                     | 2014                     | 2015                     | 2016                     | 2017                     | 2018                     | 2019                     |
|------------------------|--------------------------|--------------------------|--------------------------|--------------------------|--------------------------|--------------------------|--------------------------|
| Enrolled in treatment  | <b>n = 2300</b>          | <b>n = 2676</b>          | <b>n = 3362</b>          | <b>n = 3770</b>          | <b>n = 4249</b>          | <b>n = 3607</b>          | <b>n = 3988</b>          |
| Started treatment      | 92.6%<br>(2117/2300)     | 92.6%<br>(2479/2676)     | 92.3%<br>(3102/3362)     | 90.8%<br>(3423/3770)     | 90.5%<br>(3847/4249)     | 90.0%<br>(3245/3607)     | 88.6%<br>(3532/3988)     |
| Completed treatment    | 70.4%<br>(1490/2117)     | 71.8%<br>(1781/2479)     | 67.4%<br>(2091/3102)     | 65.1%<br>(2227/3423)     | 62.7%<br>(2411/3847)     | 66.1%<br>(2145/3245)     | 66.5%<br>(2358/3532)     |
| Would recommend        | 98.0%<br>(1177/1201)     | 97.7%<br>(1610/1648)     | 96.2%<br>(1865/1939)     | 96.6%<br>(1932/2001)     | 96.4%<br>(2111/2190)     | 95.9%<br>(1810/1887)     | 96.0%<br>(1947/2029)     |
| Was worth time         | 97.7%<br>(1169/1196)     | 97.9%<br>(1606/1641)     | 95.6%<br>(1847/1919)     | 97.1%<br>(1941/1998)     | 96.6%<br>(2115/2190)     | 95.5%<br>(1803/1887)     | 96.2%<br>(1952/2029)     |
| <b>PHQ-9</b>           |                          |                          |                          |                          |                          |                          |                          |
| Assessment             | 14.1 (6.1)               | 13.8 (5.7)               | 13.5 (5.8)               | 13.5 (5.9)               | 13.7 (5.9)               | 13.5 (6.0)               | 13.4 (5.9)               |
| Post-treatment         | 6.5 (4.4)                | 6.1 (4.1)                | 6.2 (4.0)                | 6.4 (4.0)                | 6.9 (4.1)                | 6.5 (4.2)                | 6.7 (4.4)                |
| Effect size            | 1.4<br>[1.36 – 1.50]     | 1.6<br>[1.49 – 1.61]     | 1.5<br>[1.41 – 1.52]     | 1.4<br>[1.36 – 1.46]     | 1.3<br>[1.29 – 1.39]     | 1.4<br>[1.30 – 1.41]     | 1.3<br>[1.24 – 1.34]     |
| % change               | 53.9%<br>[52.8% – 55.5%] | 55.1%<br>[54.4% - 56.7%] | 53.3%<br>[52.6% - 54.7%] | 52.6%<br>[51.7% - 53.7%] | 49.6%<br>[48.7% - 50.6%] | 51.9%<br>[50.9% - 53.0%] | 50.0%<br>[49.2% - 51.3%] |
| Reliable deterioration | 1.2%<br>(15/1234)        | 0.7%<br>(11/1602)        | 1.9%<br>(36/1906)        | 1.5%<br>(29/1962)        | 1.5%<br>(34/2228)        | 1.4%<br>(27/1952)        | 1.5%<br>(32/2174)        |
| Reliable recovery      | 62.9%<br>(612/973)       | 66.4%<br>(762/1148)      | 62.6%<br>(826/1320)      | 61.0%<br>(827/1356)      | 53.1%<br>(749/1411)      | 57.5%<br>(780/1356)      | 56.0%<br>(863/1541)      |

## Appendix

|                        |                          |                          |                          |                          |                          |                          |                          |
|------------------------|--------------------------|--------------------------|--------------------------|--------------------------|--------------------------|--------------------------|--------------------------|
| <b>GAD-7</b>           |                          |                          |                          |                          |                          |                          |                          |
| Assessment             | 12.3 (5.0)               | 11.7 (4.9)               | 12.1 (4.9)               | 12.0 (5.0)               | 12.0 (5.0)               | 12.0 (5.1)               | 11.8 (5.1)               |
| Post-treatment         | 5.8 (3.8)                | 5.5 (3.6)                | 5.7 (3.5)                | 5.7 (3.5)                | 6.0 (3.5)                | 5.8 (3.7)                | 5.9 (3.7)                |
| Effect size            | 1.5<br>[1.40 – 1.53]     | 1.4<br>[1.38 – 1.50]     | 1.5<br>[1.45 – 1.56]     | 1.5<br>[1.41 – 1.51]     | 1.4<br>[1.34 – 1.44]     | 1.4<br>[1.34 – 1.45]     | 1.3<br>[1.27 – 1.38]     |
| % change               | 52.0%<br>[51.3% - 53.9%] | 53.0%<br>[51.9% - 54.4%] | 52.9%<br>[52.2% - 54.3%] | 52.5%<br>[51.4% - 53.4%] | 50.0%<br>[49.4% - 51.2%] | 51.7%<br>[50.7% - 52.9%] | 50.8%<br>[49.5% - 51.5%] |
| Reliable deterioration | 2.4%<br>(29/1234)        | 1.4%<br>(23/1602)        | 1.9%<br>(37/1906)        | 2.5%<br>(49/1962)        | 2.3%<br>(51/2228)        | 1.9%<br>(37/1952)        | 2.6%<br>(56/2174)        |
| Reliable recovery      | 59.5%<br>(624/1049)      | 63.8%<br>(768/1203)      | 62.7%<br>(920/1468)      | 61.7%<br>(902/1463)      | 55.7%<br>(846/1519)      | 57.6%<br>(843/1463)      | 58.3%<br>(959/1645)      |
| <b>K-10</b>            |                          |                          |                          |                          |                          |                          |                          |
| Assessment             | 30.8 (7.2)               | 30.1 (6.8)               | 30.0 (6.8)               | 30.0 (6.7)               | 30.4 (6.8)               | 30.0 (7.2)               | 29.8 (7.1)               |
| Post-treatment         | 21.4 (6.4)               | 20.6 (6.2)               | 20.7 (6.1)               | 20.8 (6.0)               | 20.7 (5.7)               | 20.7 (6.4)               | 20.9 (6.4)               |
| Effect size            | 1.4<br>[1.31 – 1.45]     | 1.5<br>[1.40 – 1.52]     | 1.4<br>[1.38 – 1.50]     | 1.5<br>[1.39 – 1.50]     | 1.6<br>[1.49 – 1.60]     | 1.4<br>[1.31 – 1.42]     | 1.3<br>[1.27 – 1.37]     |
| % change               | 45.2%<br>[44.0% - 46.6%] | 47.3%<br>[45.8% - 48.3%] | 46.5%<br>[45.3% - 47.4%] | 46.0%<br>[45.2% - 47.2%] | 47.5%<br>[46.7% - 48.5%] | 46.5%<br>[45.1% - 47.4%] | 45.0%<br>[43.9% - 46.1%] |

## Appendix

| Whole days out of role |   |   |   |   |                          |                          |                          |
|------------------------|---|---|---|---|--------------------------|--------------------------|--------------------------|
| Assessment             | - | - | - | - | 5.6 (7.4)                | 5.3 (7.4)                | 5.5 (7.6)                |
| Post-treatment         | - | - | - | - | 3.5 (5.3)                | 3.5 (6.2)                | 3.6 (6.5)                |
| Effect size            | - | - | - | - | .3<br>[.26 - .39]        | .3<br>[.22 - .31]        | .3<br>[.22 - .31]        |
| % change               | - | - | - | - | 32.7%<br>[28.7% - 39.3%] | 34.0%<br>[32.0% - 39.6%] | 34.5%<br>[31.0% - 38.2%] |
| Part days out of role  |   |   |   |   |                          |                          |                          |
| Assessment             | - | - | - | - | 9.3 (8.1)                | 9.3 (8.5)                | 9.2 (8.5)                |
| Post-treatment         | - | - | - | - | 6.1 (6.5)                | 6.1 (7.4)                | 6.0 (7.4)                |
| Effect size            | - | - | - | - | .4<br>[.37 - .50]        | .4<br>[.35 - .45]        | .4<br>[.36 - .45]        |
| % change               | - | - | - | - | 34.4%<br>[32.3% - 40.9%] | 34.4%<br>[33.3% - 39.8%] | 34.8%<br>[33.7% - 40.2%] |

**Notes:** PHQ-9: Patient Health Questionnaire 9-Item; GAD-7: Generalized Anxiety Disorder 7-Item; Standard deviations (SDs) are shown in round parentheses for means; 95% confidence intervals are shown in square parentheses for effect sizes and percentage changes.



## Appendix

**Table S3. Comparison of demographic and symptom characteristics for patients across three mutually exclusive groups:**

- Started treatment but did not complete post-treatment or follow-up
- Started treatment and completed post-treatment, but not follow-up
- Started treatment and completed post-treatment and follow-up

|                                   | <b>Started treatment</b> | <b>Completed post-treatment</b> | <b>Completed post-treatment and follow-up</b> |
|-----------------------------------|--------------------------|---------------------------------|-----------------------------------------------|
| N = 21,067                        | 8,090                    | 5,070                           | n = 8,585                                     |
| Age (Mean and SD)                 | 36.6 (12.8)              | 39.4 (13.2)                     | 43.4 (14.1)                                   |
| Female                            | 73.4% (5935)             | 69.3% (3511)                    | 70.9% (6087)                                  |
| PHQ-9 at assessment (Mean and SD) | 14.6 (5.8)               | 13.4 (5.9)                      | 12.8 (5.9)                                    |
| GAD-7 at assessment (Mean and SD) | 12.6 (4.9)               | 11.9 (5.0)                      | 11.4 (5.0)                                    |
| K-10 at assessment (Mean and SD)  | 31.4 (6.8)               | 30.0 (6.9)                      | 29.1 (6.9)                                    |
